# Supplementary material for: Impact of simultaneous exposure to arboviruses on infection and transmission by Aedes aegypti mosquitoes
Source: PubMed Central journal article supplement (PMC5454532; doi:10.1038/ncomms15412), 2017-05-19
Supplement: ncomms15412-s1.pdf [file ncomms15412-s1.pdf]

**Supplementary Table 1. Infectious virus validations.**

| Experiment           | Time       | Condition            | Sample # | PCR positive* | Infectious virus* |
|----------------------|------------|----------------------|----------|---------------|-------------------|
| <b>Coinfection 1</b> | 7dpi       | CHIKV/ZIKV           | 62       | C, Z          | C                 |
|                      |            | CHIKV/ZIKV           | 42       | C             | C                 |
|                      |            | CHIKV/ZIKV           | 48       | C             | C                 |
|                      |            | CHIKV/ZIKV           | 49       | Z             | Z                 |
|                      |            | CHIKV/ZIKV           | 44       | neg           | neg               |
|                      | 14dpi      | CHIKV/ZIKV           | 100      | C, Z          | C, Z              |
|                      |            | CHIKV/ZIKV           | 102      | C, Z          | neg               |
|                      |            | CHIKV/ZIKV           | 82       | C             | C                 |
|                      |            | CHIKV/ZIKV           | 103      | C             | C                 |
|                      |            | CHIKV/ZIKV           | 89       | Z             | Z                 |
|                      |            | CHIKV/ZIKV           | 96       | neg           | neg               |
| <b>Coinfection 2</b> | 14dpi      | CHIKV/ZIKV           | 1        | C, Z          | neg               |
|                      |            | CHIKV/ZIKV           | 19       | C, Z          | C, Z              |
|                      |            | CHIKV/ZIKV           | 21       | C, Z          | C, Z              |
|                      |            | CHIKV/ZIKV           | 7        | C             | C                 |
|                      |            | CHIKV/ZIKV           | 11       | C             | C                 |
|                      |            | CHIKV/ZIKV           | 38       | Z             | neg               |
|                      |            | CHIKV/ZIKV           | 14       | neg           | neg               |
|                      |            | <b>Coinfection 3</b> | 7dpi     | CHIKV/DENV    | 37                |
| CHIKV/DENV           | 38         |                      |          | C, D          | C,D               |
| CHIKV/DENV           | 1          |                      |          | C             | C                 |
| CHIKV/DENV           | 2          |                      |          | C             | C                 |
| CHIKV/DENV           | 30         |                      |          | D             | neg               |
| CHIKV/DENV           | 10         |                      |          | neg           | neg               |
| 14dpi                | CHIKV/DENV |                      | 41       | C, D          | C, D              |
|                      | CHIKV/DENV |                      | 48       | C             | C                 |
|                      | CHIKV/DENV |                      | 80       | C             | C                 |
|                      | CHIKV/DENV |                      | 53       | D             | neg               |
|                      | CHIKV/DENV |                      | 43       | neg           | neg               |
| <b>Coinfection 4</b> | 3dpi       | CHIKV/ZIKV           | 18       | C, Z          | C,Z               |
|                      |            | CHIKV/ZIKV           | 2        | C             | C                 |
|                      |            | CHIKV/ZIKV           | 5        | C             | C                 |
|                      |            | CHIKV/ZIKV           | 19       | C             | C                 |
|                      |            | CHIKV/ZIKV           | 1        | neg           | neg               |
|                      | 7dpi       | CHIKV/DENV           | 42       | C, D          | C                 |
|                      |            | CHIKV/DENV           | 52       | C, D          | C, D              |
|                      |            | CHIKV/DENV           | 54       | C, D          | C, D              |
|                      |            | CHIKV/DENV           | 41       | neg           | neg               |
|                      |            | CHIKV/ZIKV           | 53       | C, Z          | C, Z              |
|                      |            | CHIKV/ZIKV           | 54       | C, Z          | C, Z              |
|                      |            | CHIKV/ZIKV           | 44       | C             | C                 |
|                      |            | CHIKV/ZIKV           | 45       | C             | C                 |
|                      |            | CHIKV/ZIKV           | 41       | neg           | neg               |
|                      | 14dpi      | CHIKV only           | 91       | C             | C                 |
|                      |            | CHIKV only           | 92       | C             | none              |
|                      |            | CHIKV only           | 93       | C             | none              |
|                      |            | DENV only            | 90       | D             | D                 |
|                      |            | DENV only            | 99       | D             | D                 |

|                         |       |            |     |               |         |
|-------------------------|-------|------------|-----|---------------|---------|
|                         |       | DENV only  | 101 | D             | none    |
|                         |       | ZIKV only  | 81  | Z             | Z       |
|                         |       | ZIKV only  | 88  | Z             | Z       |
|                         |       | ZIKV only  | 89  | Z             | Z       |
|                         |       | CHIKV/DENV | 82  | C, D          | D       |
|                         |       | CHIKV/DENV | 83  | C, D          | C, D    |
|                         |       | CHIKV/DENV | 90  | C, D          | C, D    |
|                         |       | CHIKV/DENV | 93  | C, D          | C, D    |
|                         |       | CHIKV/DENV | 98  | C, D          | D       |
|                         |       | CHIKV/DENV | 105 | C, D          | D       |
|                         |       | CHIKV/DENV | 116 | C, D          | D       |
|                         |       | CHIKV/DENV | 120 | C, D          | neg     |
|                         |       | CHIKV/DENV | 81  | neg           | neg     |
|                         |       | CHIKV/ZIKV | 88  | C, Z          | Z       |
|                         |       | CHIKV/ZIKV | 100 | C, Z          | neg     |
|                         |       | CHIKV/ZIKV | 87  | C             | C       |
|                         |       | CHIKV/ZIKV | 95  | C             | neg     |
|                         |       | CHIKV/ZIKV | 85  | Z             | Z       |
|                         |       | CHIKV/ZIKV | 107 | Z             | neg     |
|                         |       | CHIKV/ZIKV | 81  | neg           | neg     |
|                         |       | DENV/ZIKV  | 81  | D, Z          | neg     |
|                         |       | DENV/ZIKV  | 82  | D, Z          | D, Z    |
|                         |       | DENV/ZIKV  | 85  | D, Z          | Z       |
|                         |       | DENV/ZIKV  | 93  | D, Z          | D       |
|                         |       | DENV/ZIKV  | 108 | D, Z          | D, Z    |
|                         |       | DENV/ZIKV  | 116 | D, Z          | D, Z    |
|                         |       | DENV/ZIKV  | 119 | D, Z          | D, Z    |
|                         |       | DENV/ZIKV  | 90  | D (Z ct>36.5) | D, Z    |
|                         |       | DENV/ZIKV  | 106 | D             | D       |
|                         |       | DENV/ZIKV  | 112 | D             | D       |
|                         |       | DENV/ZIKV  | 120 | D             | D       |
|                         |       | DENV/ZIKV  | 83  | neg           | neg     |
| <b>Triple infection</b> | 14dpi | Triple     | 2   | C, D, Z       | C, D, Z |
|                         |       | Triple     | 5   | C, D, Z       | C, D, Z |
|                         |       | Triple     | 14  | C, D, Z       | C, D, Z |
|                         |       | Triple     | 15  | C, D, Z       | C, Z    |
|                         |       | Triple     | 16  | C, D, Z       | D, Z    |
|                         |       | Triple     | 17  | C, D, Z       | C, D, Z |
|                         |       | Triple     | 32  | C, D          | none    |
|                         |       | Triple     | 45  | C, D          | C       |
|                         |       | Triple     | 48  | D, Z          | D, Z    |
|                         |       | Triple     | 3   | neg           | neg     |
|                         | 21dpi | Triple     | 4   | D, Z          | Z       |
|                         |       | Triple     | 22  | D, Z          | D, Z    |
|                         |       | Triple     | 36  | D, Z          | D, Z    |
|                         |       | Triple     | 43  | C, Z          | Z       |
|                         |       | Triple     | 29  | C, D, Z       | Z       |
|                         |       | Triple     | 48  | C, D, Z       | D, Z    |
|                         |       | Triple     | 14  | Neg           | neg     |
|                         |       | Triple     | 15  | neg           | neg     |

\* virus abbreviations: C =CHIKV; D=DENV-2; Z=ZIKV

**Supplementary Table 2.** Primers and probes used for multiplex qRT-PCR.

| Primer name                     | Sequence                                 |
|---------------------------------|------------------------------------------|
| Zika1087_CDC_F <sup>1</sup>     | CCGCTGCCCAACACAAG                        |
| Zika1108_CDC_FAM <sup>1</sup>   | AGCCTACCTTGACAAGCAGTCAGACACTCAA          |
| Zika1163_CDC_R <sup>1</sup>     | CCACTAACGTTCTTTGCAGACAT                  |
| CHIKV_qRT-PCR_JF_F <sup>2</sup> | CACCCGAAGTAGCCCTGAATG                    |
| CHIKV3288_Cy5 <sup>2</sup>      | GAGAATAGCCCGCTGTCTAGATCCAC               |
| CHIKV_qRT-PCR_JF_R <sup>2</sup> | TCCGAACATCTTTCCTCCCG                     |
| DENV2-Merida_4198F              | TCGTATGGAGGAGGCTGGAA                     |
| DENV2-Merida_4305R              | GGGTTTTGTTGGACGGCTC                      |
| DENV2-Merida_4219_HEX           | CTAGAAGGAGAATGGAAGGAAGGAG                |
| CHIKV_T7_2388F                  | TAATACGACTCACTATAGGGCGCTGCTTGAATGGATGC   |
| CHIKV_T7_3505R                  | TAGTCTCCTGTTGGCCGGTA                     |
| DENV2-Merida_T7_3962F           | TAATACGACTCACTATAGGGAACGGGCTGGAGTATTGTGG |
| DENV2-Merida_T7_4840R           | CTGGGTCTGTGAAATGGGCT                     |

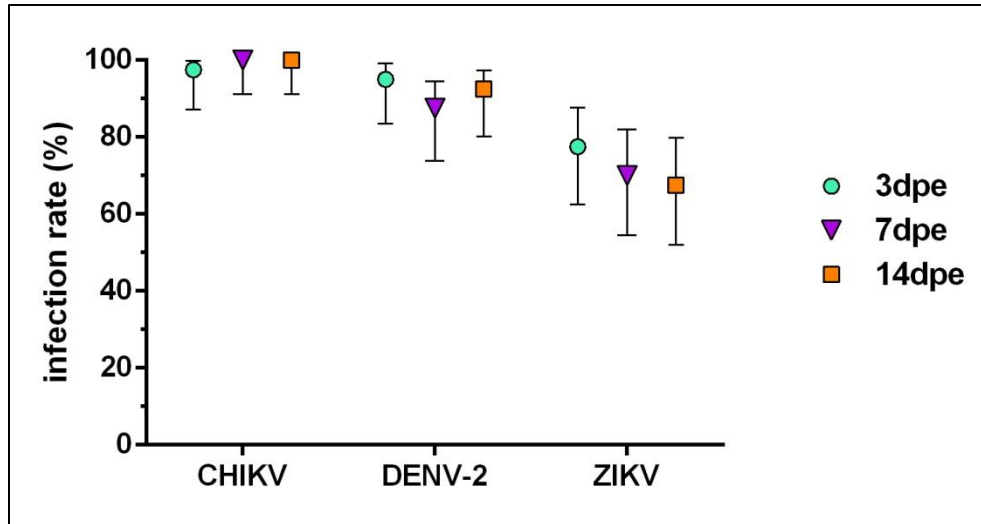

**Supplementary Figure 1. Infection rates are comparable across time points.** Infection rates for CHIKV, DENV-2 and ZIKV at all time points during single infection from one representative experiment (Experiment 4, see Table 3). Each data point indicates the percentage of infected mosquitoes (n=40 per condition/time point) and error bars indicate 95% CI. No significant differences were found between time points ( $p > 0.05$ ; Fisher's exact test).

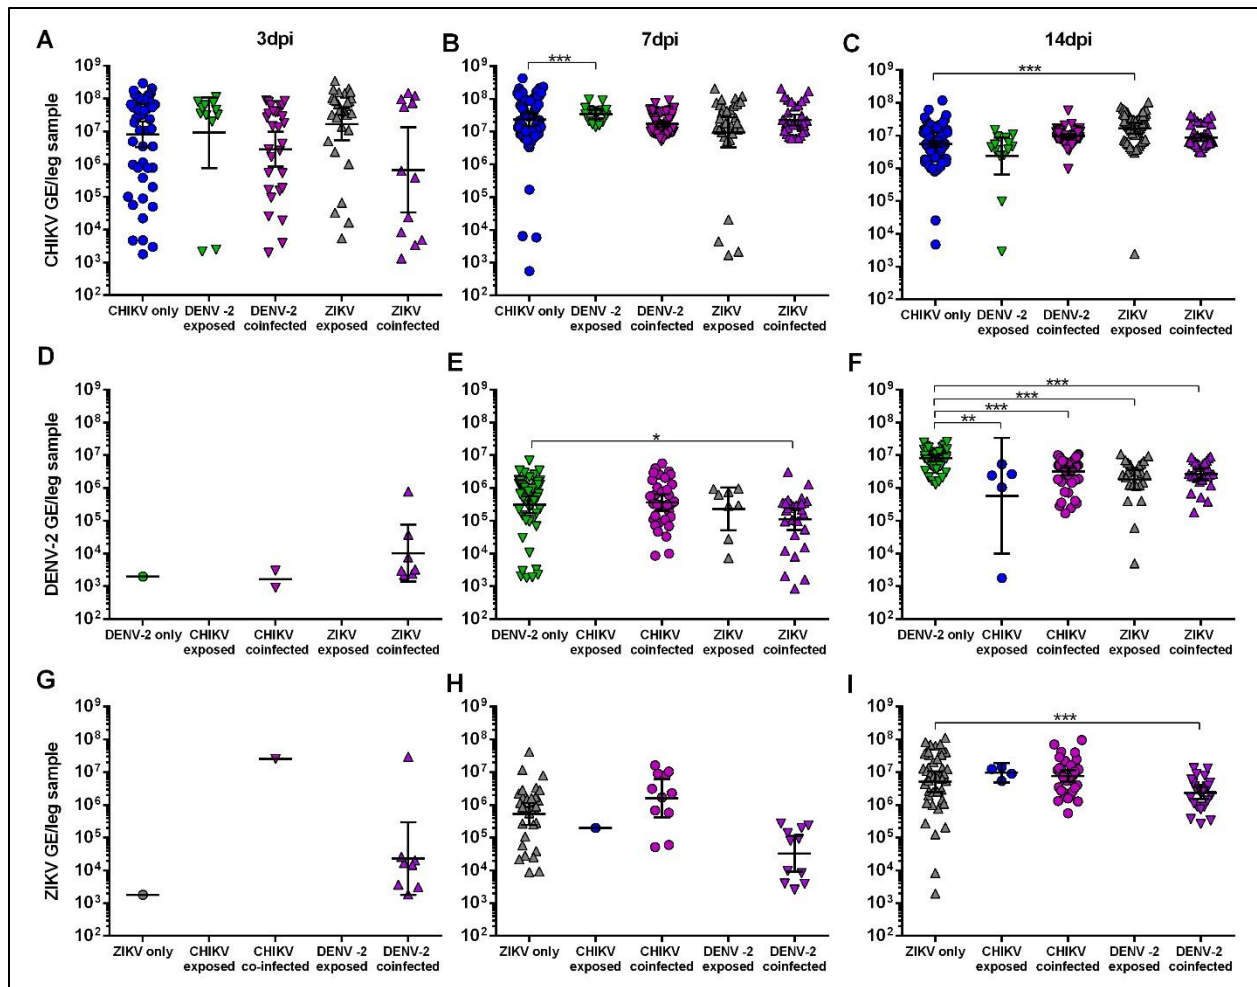

**Supplementary Figure 2. RNA levels in legs positive for CHIKV, DENV-2 and/or ZIKV.** GE/legs are shown for samples positive for CHIKV (A, B, C), DENV-2 (D, E, F) and ZIKV (G, H, I) at 3dpi (A, D, G), 7dpi (B, E, H) and 14dpi (C, F, I). ‘Exposed’ indicates samples that were co-exposed with the named virus without resulting in coinfection. ‘Coinfected’ samples were positive for both viruses. The geometric mean is indicated and error bars represent the 95% confidence interval. Statistical significance was determined using one-way ANOVA with multiple comparisons (\* $p < 0.05$ ; \*\* $p < 0.01$ ; \*\*\* $p < 0.0001$ ).

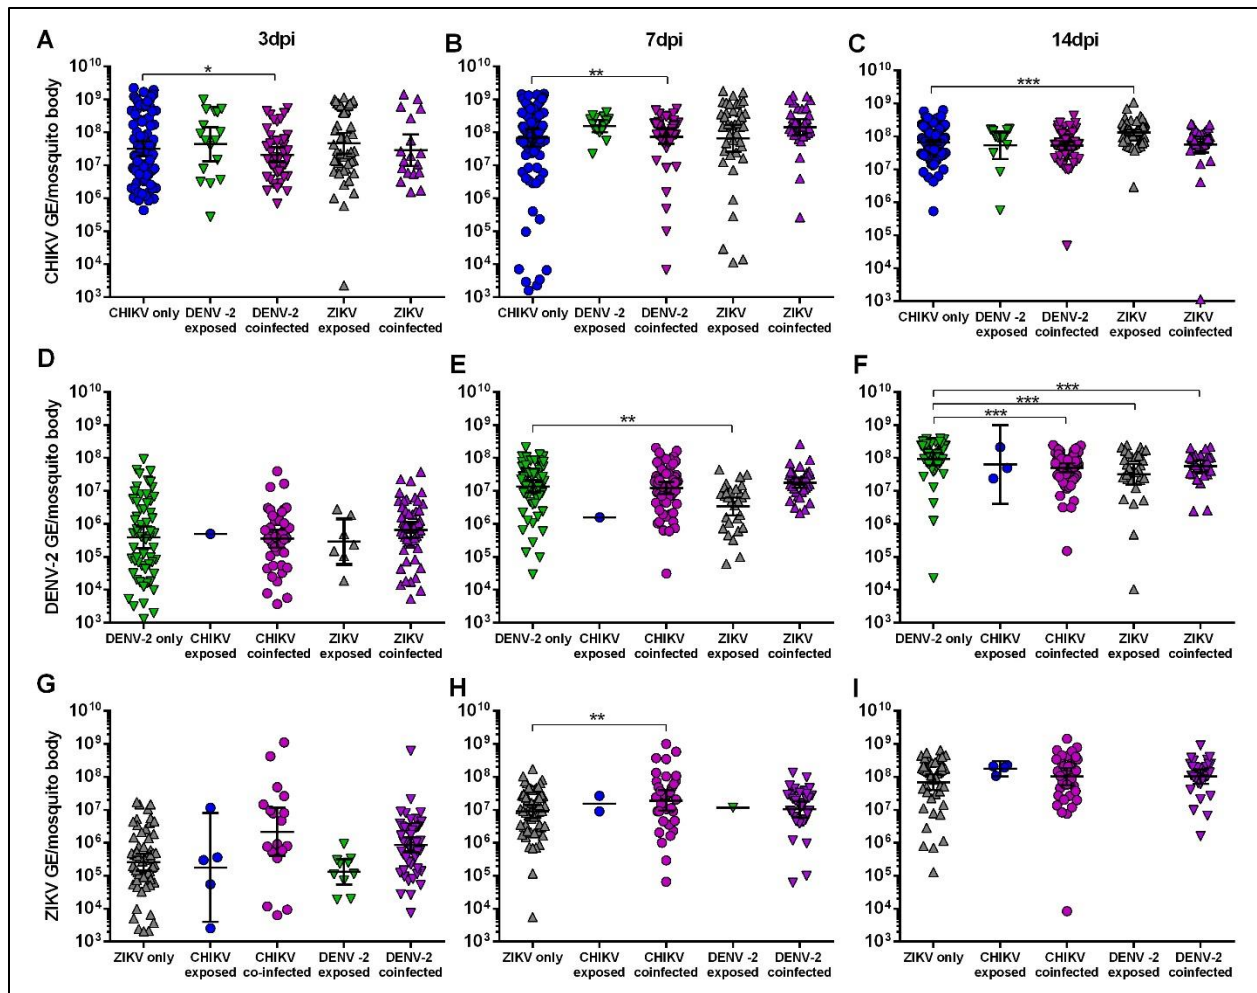

**Supplementary Figure 3. RNA levels in bodies positive for CHIKV, DENV-2 and/or ZIKV.** GE/body are shown for samples positive for CHIKV (A, B, C), DENV-2 (D, E, F) and ZIKV (G, H, I) at 3dpi (A, D, G), 7dpi (B, E, H) and 14dpi (C, F, I). ‘Exposed’ indicates samples that were co-exposed with the named virus without resulting in coinfection. ‘Coinfected’ samples were positive for both viruses. The geometric mean is indicated and error bars represent the 95% confidence interval. Statistical significance was determined using one-way ANOVA with multiple comparisons (\* $p < 0.05$ ; \*\* $p < 0.01$ ; \*\*\* $p < 0.0001$ ).

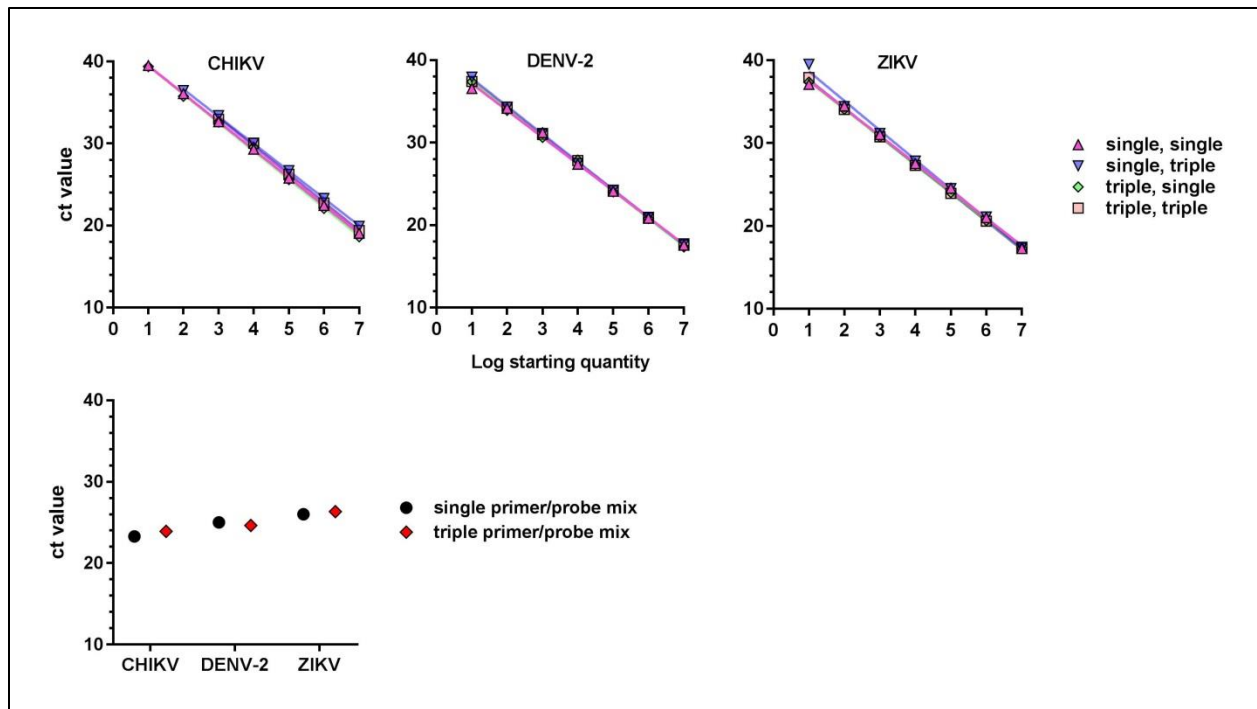

**Supplementary Figure 4. Multiplex qRT-PCR sensitivity and specificity.** qRT-PCR was performed as described (see methods) to quantify in parallel CHIKV (A), DENV-2 (B) and ZIKV (C) RNA standards. The four different conditions were as follows: single virus standards with single primer/probe mix (single, single); single virus standards with triple primer/probe mix (single, triple); triple virus standards with single primer/probe mix (triple, single); triple standards with triple primer/probe mix (triple, triple). Panel D shows representative quantification using the three single primer/probe mixes as well as a multiplexed triple primer/probe mix from a triple positive leg sample. Single and triple primer/probe mix results for each virus were within a 0.65 ct value difference.

### Supplementary References

- 1 Lanciotti, R. S. *et al.* Genetic and serologic properties of Zika virus associated with an epidemic, Yap State, Micronesia, 2007. *Emerging infectious diseases* **14**, 1232-1239, doi:10.3201/eid1408.080287 (2008).
- 2 Grubaugh, N. D. *et al.* Xenosurveillance: a novel mosquito-based approach for examining the human-pathogen landscape. *PLoS neglected tropical diseases* **9**, e0003628, doi:10.1371/journal.pntd.0003628 (2015).
